# Supplementary material for: Target-D: a stratified individually randomized controlled trial of the diamond clinical prediction tool to triage and target treatment for depressive symptoms in general practice: study protocol for a randomized controlled trial
Source: Springer Nature journal article supplement (doi:10.1186/s13063-017-2089-y), 2017-07-20
Supplement: MOESM1 [file 13318088]

## World Health Organization Trial Registration Data Set\*

| Data category                                 | Information                                                                                                                                                                                                                                                                                                                                                   |
|-----------------------------------------------|---------------------------------------------------------------------------------------------------------------------------------------------------------------------------------------------------------------------------------------------------------------------------------------------------------------------------------------------------------------|
| Primary registry and trial identifying number | Australian New Zealand Clinical Trials Registry<br>ACTRN12616000537459                                                                                                                                                                                                                                                                                        |
| Date of registration in primary registry      | 27 April, 2016                                                                                                                                                                                                                                                                                                                                                |
| Secondary identifying numbers                 | n/a                                                                                                                                                                                                                                                                                                                                                           |
| Source(s) of monetary or material support     | National Health and Medical Research Council (NHMRC)                                                                                                                                                                                                                                                                                                          |
| Primary sponsor                               | University of Melbourne<br>Grattan Street<br>Parkville<br>VIC 3010<br>Australia                                                                                                                                                                                                                                                                               |
| Secondary sponsor(s)                          | n/a                                                                                                                                                                                                                                                                                                                                                           |
| Contact for public queries                    | AC via email                                                                                                                                                                                                                                                                                                                                                  |
| Contact for scientific queries                | SF via email                                                                                                                                                                                                                                                                                                                                                  |
| Public title                                  | The Target-D Study: An individually randomised controlled trial of a clinical prediction tool to triage and target treatment for depressive symptoms in general practice.                                                                                                                                                                                     |
| Scientific title                              | The Target-D Study: An individually randomised controlled trial of a clinical prediction tool to triage and target treatment for depressive symptoms in general practice.                                                                                                                                                                                     |
| Countries of recruitment                      | Australia                                                                                                                                                                                                                                                                                                                                                     |
| Health condition(s) or problem(s) studied     | Depression                                                                                                                                                                                                                                                                                                                                                    |
| Intervention(s)                               | Active: <ol style="list-style-type: none"> <li>1. myCompass (self-help iCBT)</li> <li>2. This Way Up (guided iCBT)</li> <li>3. Collaborative care</li> </ol> Comparison: <ol style="list-style-type: none"> <li>1. Usual care</li> </ol>                                                                                                                      |
| Key inclusion and exclusion criteria          | Inclusion: Aged 18-65; PHQ-2 score of 2 or more; regular access to computer with internet; able to comply with study intervention and assessments; if taking antidepressants, at least 1 month with the same medication<br>Exclusion: Currently taking antipsychotic medication, currently seeing or planning to see a psychologist, currently accessing iCBT |
| Study type                                    | <i>Type</i><br>Interventional<br><i>Design</i><br>Allocation: randomised; concealment via online algorithm<br>Masking: n/a<br>Assignment: parallel                                                                                                                                                                                                            |

|                         |                                                                           |
|-------------------------|---------------------------------------------------------------------------|
|                         | Purpose: treatment                                                        |
| Date of first enrolment | April 2016                                                                |
| Target sample size      | 570                                                                       |
| Recruitment status      | Recruiting                                                                |
| Primary outcome(s)      | Change in depression symptom severity (PHQ-9)                             |
| Key secondary outcomes  | Cost effectiveness, quality of life, anxiety, mental health self-efficacy |

\*For full Trial Registration Data see <https://anzctr.org.au>
