# Supplementary material for: Target-D: a stratified individually randomized controlled trial of the diamond clinical prediction tool to triage and target treatment for depressive symptoms in general practice: study protocol for a randomized controlled trial
Source: Springer Nature journal article supplement (doi:10.1186/s13063-017-2089-y), 2017-07-20
Supplement: MOESM3 [file 13318088]

## **Target-D study sites**

The Target-D study will be conducted in at least 10 general practices in Victoria, Australia. At the time of submission, 8 sites had been confirmed. The location of these practices is as follows:

1. Essendon
2. Footscray
3. Preston
4. Ashburton
5. Mooroolbark
6. Noble Park
7. Altona Meadows
8. Surrey Hills
